# Supplementary material for: Effects of Hypoxia and Chitosan on Equine Umbilical Cord‐Derived Mesenchymal Stem Cells
Source: Hindawi journal article supplement (doi:10.1155/2016/2987140), 2016-01-01
Supplement: f1 [file 2987140.f1.pdf]

**Supplemental data:**

**Table 1:** *In vitro* comparison of cells cultured under standard conditions (S) or conditioned on chitosan (C) under hypoxia. Results are expressed as means and SD (in parentheses).

| Parameter    | Standard cells Day 3 | Conditioned cells Day 3 | P value Day 3 | Standard cells Day 7 | Conditioned cells Day 7 | P value Day 7 |
|--------------|----------------------|-------------------------|---------------|----------------------|-------------------------|---------------|
| DNA          | 404.1 (51.4)         | 102.7 (7.0)             | 0.002*        | 783.6 (93.1)         | 218.3 (13.3)            | 0.002*        |
| <i>Sox2</i>  | 1 (0.0)              | 1.26 (1.77)             | 0.180         | 1.20 (0.26)          | 6.07 (3.36)             | 0.025*        |
| <i>Oct4</i>  | 1 (0.0)              | 1.04 (1.16)             | 0.180         | 1.20 (0.28)          | 3.40 (1.46)             | 0.025*        |
| <i>Nanog</i> | 1 (0.0)              | 1.09 (0.81)             | 0.655         | 0.93 (0.39)          | 9.40 (8.34)             | 0.025*        |

Difference within pairs was calculated as the percentage change between C and S. \* indicates statistical significance at the 0.05 level of significance.

**Table 2:** Magnitude of change (mean  $\pm$  SD) in DNA content and gene expression within each group between day 3 and day 7

|              | Standard cells                         | Conditioned cells                        | P value |
|--------------|----------------------------------------|------------------------------------------|---------|
| DNA Content  | 1.00 $\pm$ 0.46 (p=0.002) <sup>#</sup> | 1.14 $\pm$ 0.23 (p=0.002) <sup>#</sup>   | 0.527   |
| <i>Sox2</i>  | 0.20 $\pm$ 0.26 (p=0.18)               | 15.06 $\pm$ 15.05 (p=0.025) <sup>#</sup> | 0.025*  |
| <i>Oct4</i>  | 0.20 $\pm$ 0.28 (p=0.18)               | 5.36 $\pm$ 4.56 (p=0.025) <sup>#</sup>   | 0.046*  |
| <i>Nanog</i> | -0.07 $\pm$ 2.53 (p=0.655)             | 11.37 $\pm$ 9.62 (p=0.025) <sup>#</sup>  | 0.025*  |

<sup>#</sup>denotes p-value < 0.05 between day 3 and 7 within each group.

\*denotes a significant difference (p-value < 0.05) between cells exposed to chitosan and hypoxia compared to standard conditions.

**Table 3:** Tensile properties of tendons treated with cells cultured under standard conditions (S, N=6) or cells conditioned with chitosan and hypoxia (C, N=6) at 28 days. Results are standardized to contralateral tendons with empty defects (E, N=12) and expressed as means and SD (in parentheses). Difference between paired S and E was calculated as the percentage change between S and E. Difference between paired C and E was calculated as the percentage change between C and E.\* indicates significance at the 0.05 level of significance, based on a paired t-test comparing the magnitude of change between C and E to that between S and E, within pairs of tendons treated with cells from the same horse. <sup>#</sup> denotes a statistical difference between

| treated tendons and their matched untreated tendons. |                            |                             |                                              |                                |                                              |               |
|------------------------------------------------------|----------------------------|-----------------------------|----------------------------------------------|--------------------------------|----------------------------------------------|---------------|
| Parameter                                            | Tendons with Empty defects | Tendons with Standard cells | Difference between paired S and E tendons, % | Tendons with Conditioned cells | Difference between paired C and E tendons, % | P value (C-S) |
| Length (mm)                                          | 7.01<br>(0.49)             | 7.03<br>(0.41)              | 1.67<br>(5.88)                               | 6.94<br>(0.57)                 | -2.22<br>(4.53)                              | 0.23          |
| Cross area (mm <sup>2</sup> )                        | 14.49<br>(3.27)            | 14.95<br>(4.14)             | 23.70<br>(48.11)                             | 11.99<br>(3.41)                | -26.54<br>(17.27) <sup>#</sup>               | 0.04*         |
| Modulus (Mpa)                                        | 2.28<br>(1.33)             | 2.92<br>(1.27)              | 34.53<br>(88.89)                             | 4.49<br>(3.20)                 | 176.60<br>(223.06) <sup>#</sup>              | 0.04*         |
| Relaxation time (s)                                  | 13.96<br>(2.59)            | 13.42<br>(3.11)             | -11.69<br>(19.56)                            | 14.33<br>(1.75)                | 18.65<br>(33.18)                             | 0.08          |
| Stiffness (N/mm)                                     | 4.31<br>(1.84)             | 5.78<br>(1.94)              | 36.45<br>(68.43)                             | 7.29<br>(5.15)                 | 98.96<br>(120.87)                            | 0.11          |
| Hysteresis (%)                                       | 0.29<br>(0.19)             | 0.34<br>(0.17)              | 173.47<br>(421.68)                           | 0.22<br>(0.19)                 | -3.45<br>(61.96)                             | 0.38          |

**Table 4:** Histological features of tendons treated with cells cultured under standard conditions (S) or cells conditioned with chitosan and hypoxia (C) at 7 and 28 days, standardized to contralateral tendons with empty defects (E) and expressed as means and SD (in parentheses). Results at 28 days are based on sample size N = 12, 6, and 6 for E, S, and C respectively. Results at 7 days are based on sample size N = 8, 4, and 4 for E, S, and C respectively. Difference between paired S and E was calculated as the percentage change between S and E. Difference between paired C and E was calculated as the percentage change between C and E. The P value is based on a Wilcoxon signed-rank test comparing the magnitude of change between C and E to that between S and E, within pairs of tendons treated with cells from the same horse.

| Parameter                       | Tendons with Empty defects | Tendons with Standard cells | Difference between paired S and E tendons, % | Tendons with Conditioned cells | Difference between paired C and E tendons, % | P value (C-S) |
|---------------------------------|----------------------------|-----------------------------|----------------------------------------------|--------------------------------|----------------------------------------------|---------------|
| Fluorescence at day 7 (% area)  | 12.74<br>(15.23)           | 42.30<br>(8.60)             | 2,070.30<br>(3,073.08)                       | 19.12<br>(14.48)               | 227.41<br>(253.86)                           | 0.69          |
| Histological score at day 7     | 3.05<br>(0.71)             | 3.17<br>(0.33)              | 0.89<br>(21.89)                              | 3.44<br>(0.43)                 | 25.71<br>(33.32)                             | 0.19          |
| Fluorescence at day 28 (% area) | 1.92<br>(1.72)             | 6.53<br>(4.00)              | 427.51<br>(767.75)                           | 4.74<br>(1.77)                 | 389.84<br>(213.59)                           | 0.72          |
| Histological score at day 28    | 4.27<br>(1.10)             | 4.31<br>(1.04)              | 16.87<br>(48.14)                             | 3.88<br>(1.08)                 | -14.05<br>(16.70)                            | 0.11          |
